# Supplementary material
Source: PubMed Central journal article supplement (PMC10018287)
Supplement: EIJ-D-22-00654_Koshy_SD.pdf [file EIJ-D-22-00654_Koshy_SD.pdf]

**Supplementary data**

**Supplementary Table 1. Periprocedural complications.**

|                               | Ticagrelor Or Prasugrel<br>(N=2,860) | Clopidogrel<br>(N=8,648) | P-Value |
|-------------------------------|--------------------------------------|--------------------------|---------|
| Side Branch Closure           | 71 (2.5%)                            | 176 (2.0%)               | 0.152   |
| Tamponade                     | 0 (0.0%)                             | 3 (0.0%)                 | 1       |
| Slow Flow/No Flow             | 30 (1.0%)                            | 90 (1.0%)                | 0.97    |
| Vessel Closure                | 8 (0.3%)                             | 14 (0.2%)                | 0.211   |
| <b>Vascular Complications</b> |                                      |                          |         |
| Access Site Occlusion         | 0 (0.0%)                             | 0 (0.0%)                 | N/A     |
| Distal Embolism               | 0 (0.0%)                             | 2 (0.0%)                 | 1       |
| Dissection                    | 1 (0.0%)                             | 5 (0.1%)                 | 1       |
| Pseudoaneurysm (Psa)          | 3 (0.1%)                             | 17 (0.2%)                | 0.439   |
| Arteriovenous (Av) Fistula    | 0 (0.0%)                             | 1 (0.0%)                 | 1       |

**Supplementary Table 2. Propensity score stratification outcomes comparing prasugrel 5 mg and prasugrel 10 mg versus clopidogrel.**

| <b>Outcome</b>                                                                 | <b>Prasugrel -<br/>5mg Dose<br/>(N=527)</b> | <b>Clopidogrel<br/>(N=8,637)</b> | <b>Log-Rank<br/>P-Value</b> | <b>Unadjusted<br/>Hazard Ratio<br/>(95% Ci)</b> | <b>P-Value</b> |
|--------------------------------------------------------------------------------|---------------------------------------------|----------------------------------|-----------------------------|-------------------------------------------------|----------------|
| Composite<br>(Death, Myocardial<br>Infarction, Stroke, Or Stent<br>Thrombosis) | 9 (2.0%)                                    | 223 (3.1%)                       | 0.167                       | 0.63 (0.32 -<br>1.22)                           | 0.171          |

| <b>Outcome</b>                                                                 | <b>Prasugrel -<br/>10mg Dose<br/>(N=553)</b> | <b>Clopidogrel<br/>(N=8,637)</b> | <b>Log-Rank<br/>P-Value</b> | <b>Unadjusted<br/>Hazard Ratio<br/>(95% Ci)</b> | <b>P-Value</b> |
|--------------------------------------------------------------------------------|----------------------------------------------|----------------------------------|-----------------------------|-------------------------------------------------|----------------|
| Composite<br>(Death, Myocardial<br>Infarction, Stroke, Or Stent<br>Thrombosis) | 12 (2.5%)                                    | 223 (3.1%)                       | 0.417                       | 0.79 (0.44 -<br>1.41)                           | 0.419          |

**Supplementary Table 3. Adjusted associations between meds at discharge and adverse events at 1 year after index procedure, stratified by Academic Research Consortium high bleeding risk.**

| Outcomes                               | Hbr (N=4536)                     |                      |                                             |         | No Hbr (N=6972)                  |                      |                                             |         | Interaction P-Value <sup>‡</sup> |
|----------------------------------------|----------------------------------|----------------------|---------------------------------------------|---------|----------------------------------|----------------------|---------------------------------------------|---------|----------------------------------|
|                                        | Ticagrelor Or Prasugrel (N= 798) | Clopidogrel (N=3738) | Adjusted Hazard Ratio <sup>†</sup> (95% Ci) | P-Value | Ticagrelor Or Prasugrel (N=2062) | Clopidogrel (N=4910) | Adjusted Hazard Ratio <sup>†</sup> (95% Ci) | P-Value |                                  |
| Death, Mi, Stroke, Or Stent Thrombosis | 34 (5.1%)                        | 159 (5.2%)           | 0.91 (0.61 - 1.35)                          | 0.63    | 34 (1.9%)                        | 64 (1.5%)            | 1.13 (0.71 - 1.79)                          | 0.603   | 0.58                             |
| Death                                  | 13 (2.0%)                        | 91 (3.0%)            | 0.71 (0.39 - 1.30)                          | 0.27    | 12 (0.7%)                        | 17 (0.4%)            | 1.42 (0.58 - 3.47)                          | 0.444   | 0.246                            |
| Mi                                     | 19 (2.8%)                        | 68 (2.3%)            | 1.04 (0.59 - 1.84)                          | 0.894   | 20 (1.1%)                        | 36 (0.9%)            | 1.36 (0.76 - 2.44)                          | 0.303   | 0.866                            |
| Stroke                                 | 4 (0.6%)                         | 10 (0.3%)            | 2.41 (0.70 - 8.28)                          | 0.161   | 1 (0.1%)                         | 9 (0.2%)             | 0.17 (0.02 - 1.34)                          | 0.092   | 0.085                            |
| Definite Or Probable Stent Thrombosis  | 4 (0.5%)                         | 10 (0.3%)            | 1.48 (0.38 - 5.72)                          | 0.571   | 7 (0.4%)                         | 10 (0.2%)            | 1.15 (0.40 - 3.31)                          | 0.788   | 0.996                            |
| Bleeding (Follow-Up)                   | 10 (1.5%)                        | 74 (2.3%)            | 0.56 (0.27 - 1.18)                          | 0.129   | 15 (0.8%)                        | 41 (0.9%)            | 1.01 (0.54 - 1.90)                          | 0.963   | 0.387                            |

Ci: Confidence Interval, Hbr: High Bleeding Risk, Mi: Myocardial Infarction

<sup>†</sup> Model Adjusted For Age, Sex, Bmi, Race, Current Smoker, Hypertension, Hyperlipidemia, Cerebrovascular Disease, Prior Mi, Prior Cabg, Lvef, Calcification-Severe/Moderate, Cto, Cmplx Pci, Diabetes, And Ckd.

<sup>‡</sup> P Value Is Obtained From The Interaction Test Between Hbr And P2y12 Inhibitor Prescribed At Discharge After Applying Model Adjustment

The Percentages Mentioned Above Represent K-M Rates At 12 Months After Index Procedure

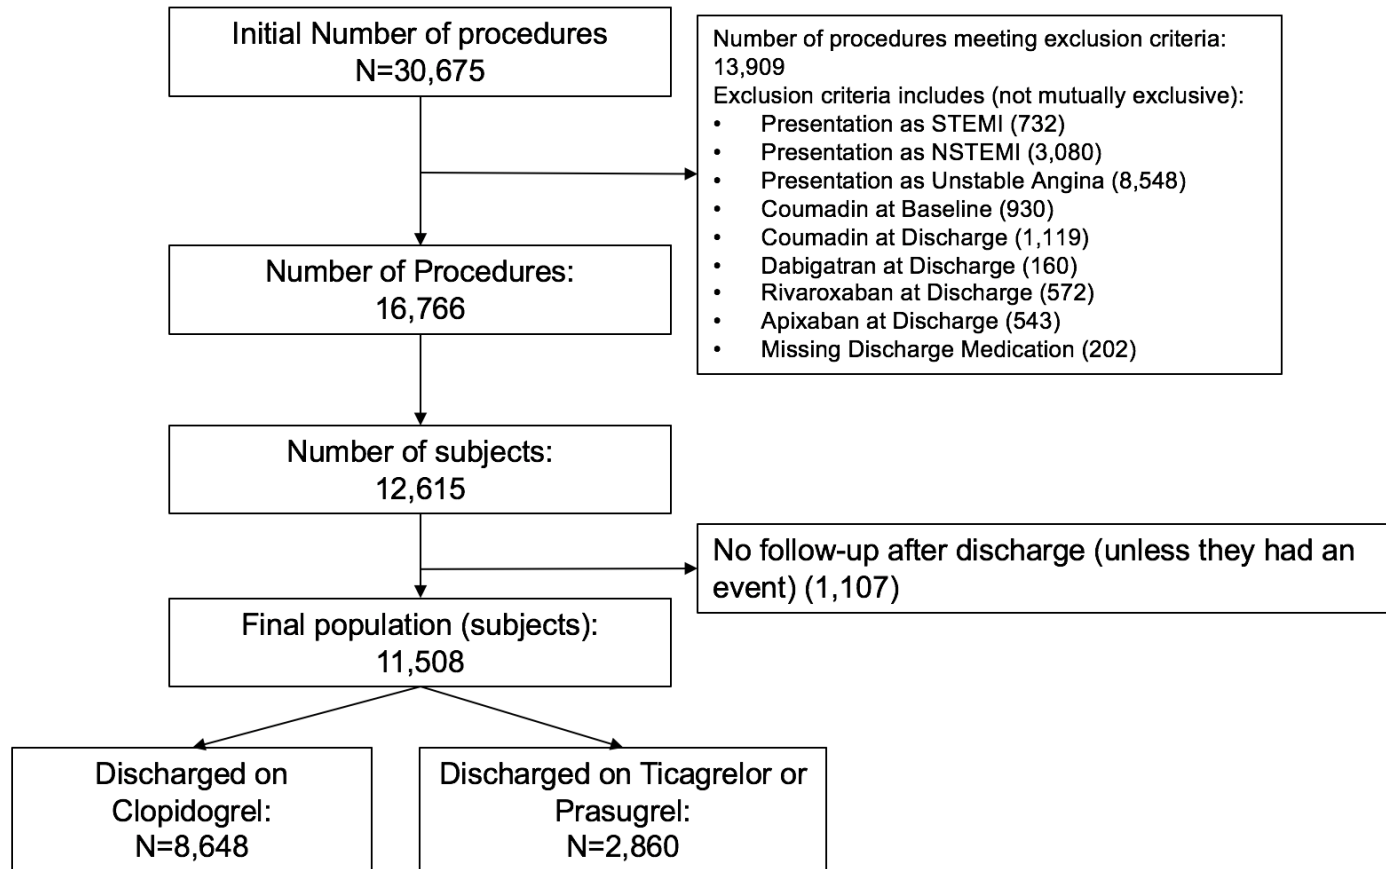

**Supplementary Figure 1.** Study inclusion flowchart.

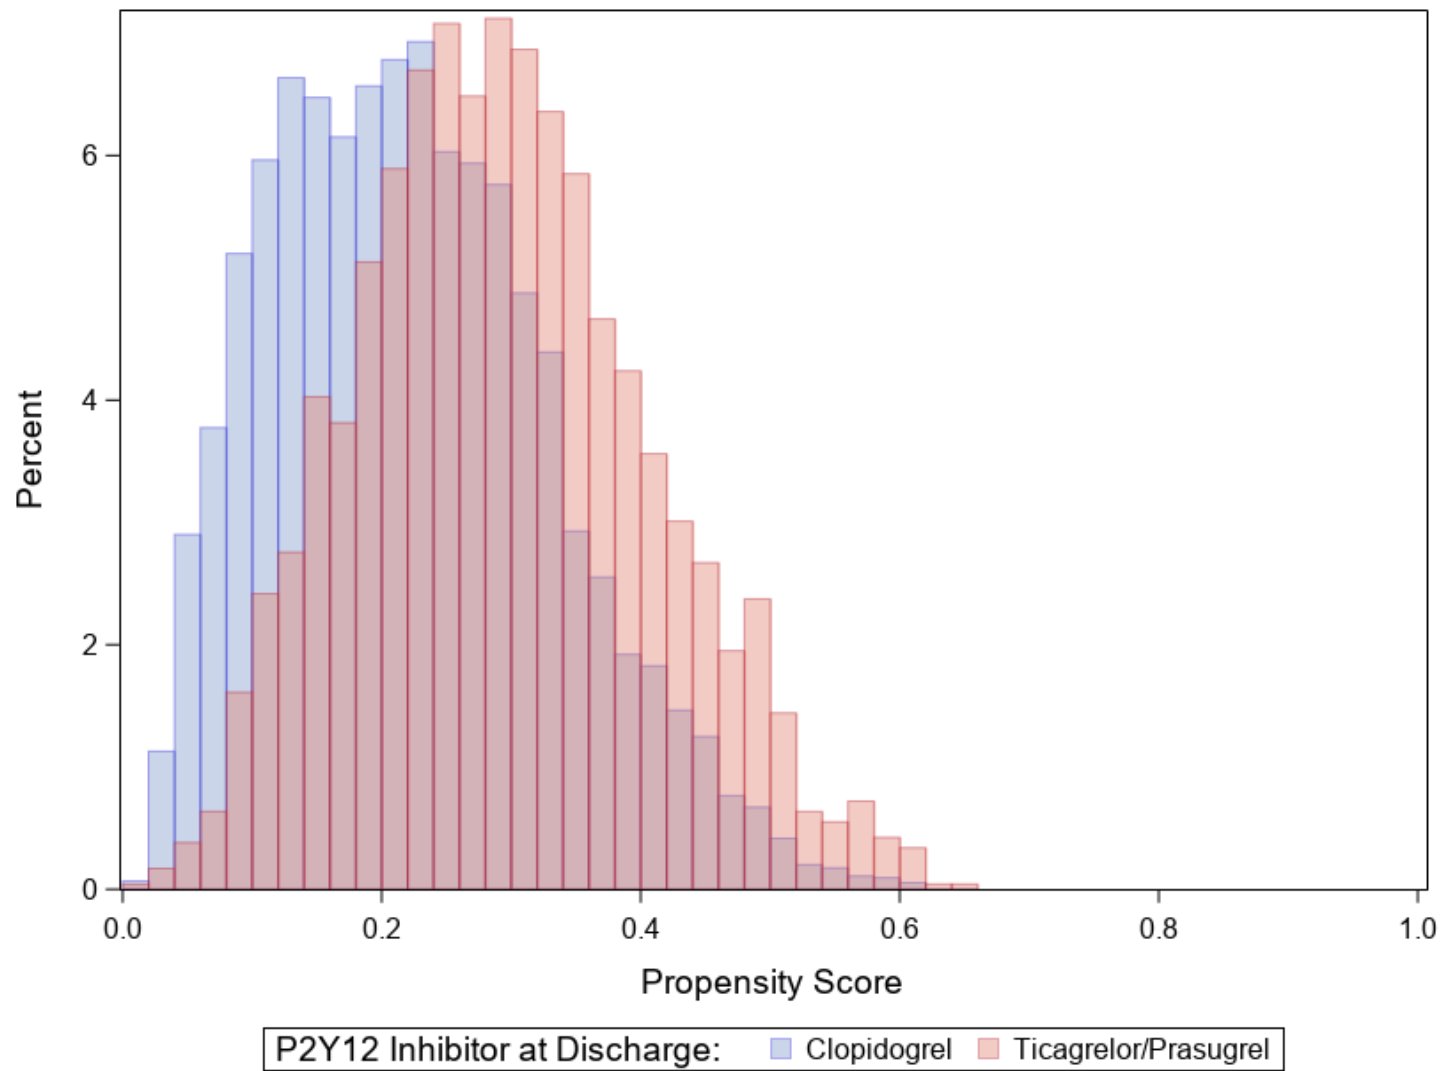

Supplementary Figure 2. Distribution of propensity scores.
